# Supplementary material for: Treatment of classic mid-trimester preterm premature rupture of membranes (PPROM) with oligo/ anhydramnion between 22 – 26 weeks’ gestation by means of continuous amnioinfusion: a randomized multicentric prospective controlled TRIAL
Source: Research Square preprint supplement (doi:10.21203/rs.3.rs-572519/v1), 2021-12-01
Supplement: Supplementary file 1 [file 153fc898b734bf03dd082bb7.docx]

**Table 2**

Comparison between the Amniotic Flush Solution and standard saline solutions in relation to the human amniotic fluid.
